# Supplementary material for: Optimization of conjugated polymer blend concentration for high performance organic solar cells
Source: Springer Nature journal article supplement (doi:10.1007/s10854-018-9735-3), 2018-07-25
Supplement: MOESM1 [file 15979174]

Optimisation of Conjugated Polymer Concentration for High Performance Organic Solar Cells

Cheng Xua, Matthew Wrighta, Naveen Kumar Elumalaia*, MD Arafat Mahmuda, Vinicius R. Gonçalesb, Mushfika Upamaa, Ashraf Uddina

*aSchool of Photovoltaic and Renewable Energy Engineering, University of New South Wales, 2052, Sydney, Australia.*

*bSchool of Chemistry and Australian Centre for NanoMedicine, University of New South Wales, 2052, Sydney, Australia.*

**Supporting information:**

**
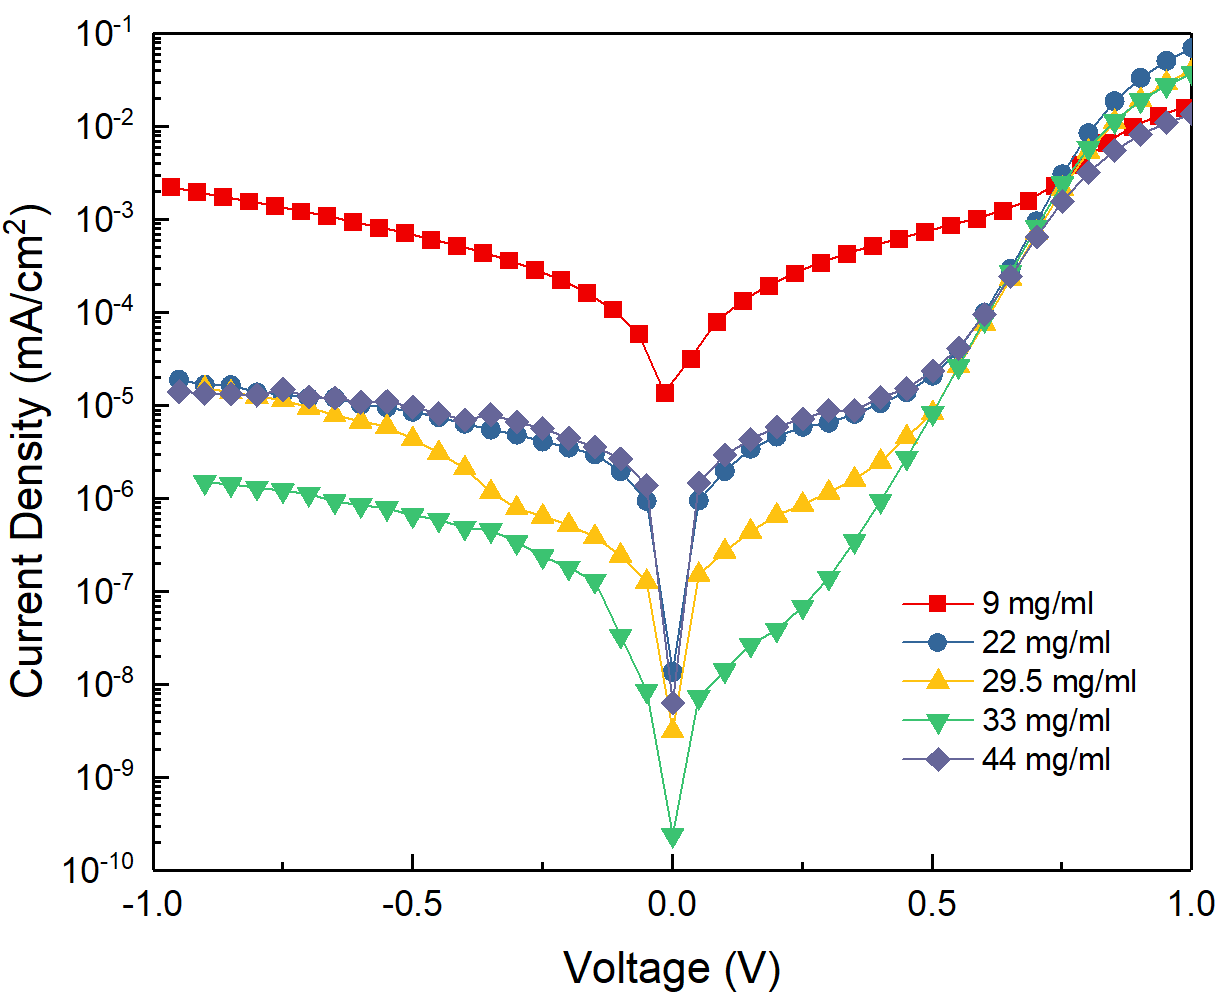
**

Figure S1. Dark I-V curves of PffBT4T-2OD:PC71BM devices at room temperature with various concentrations.


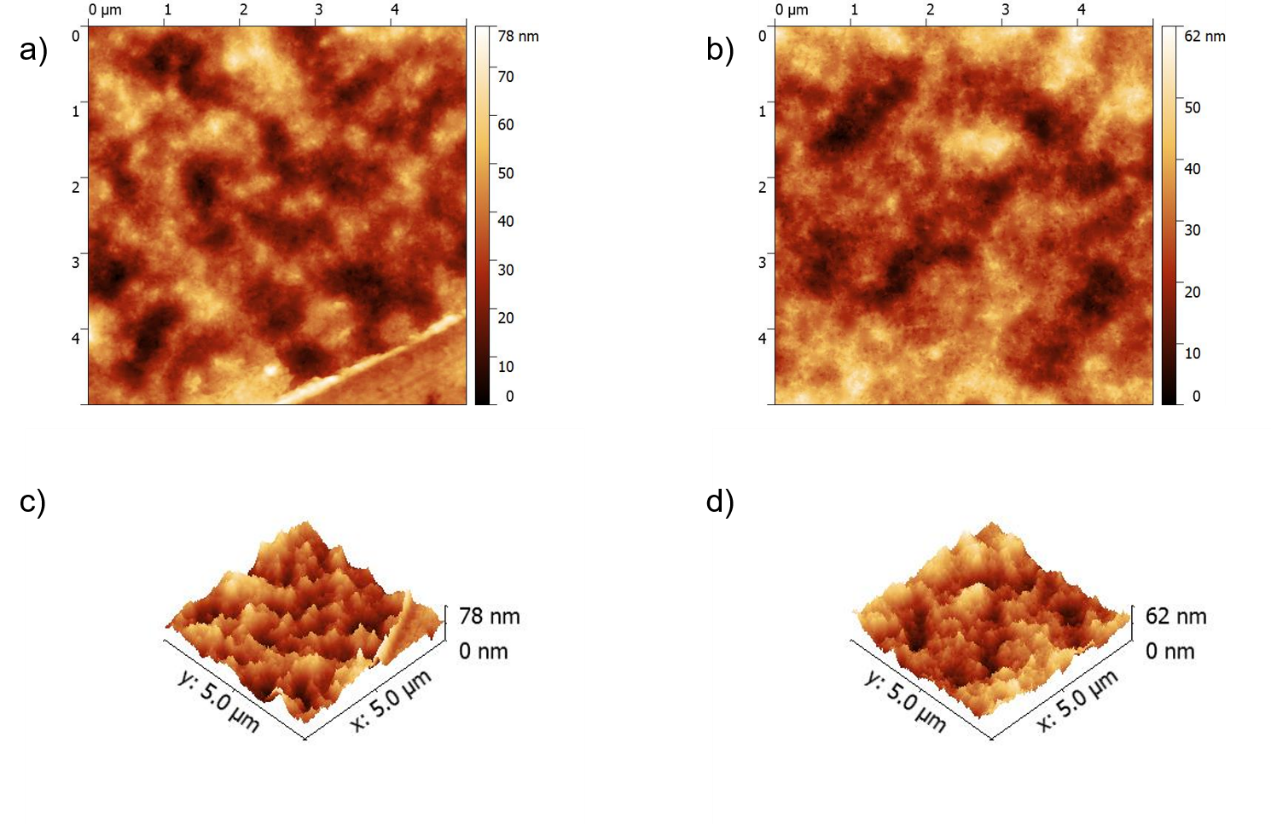

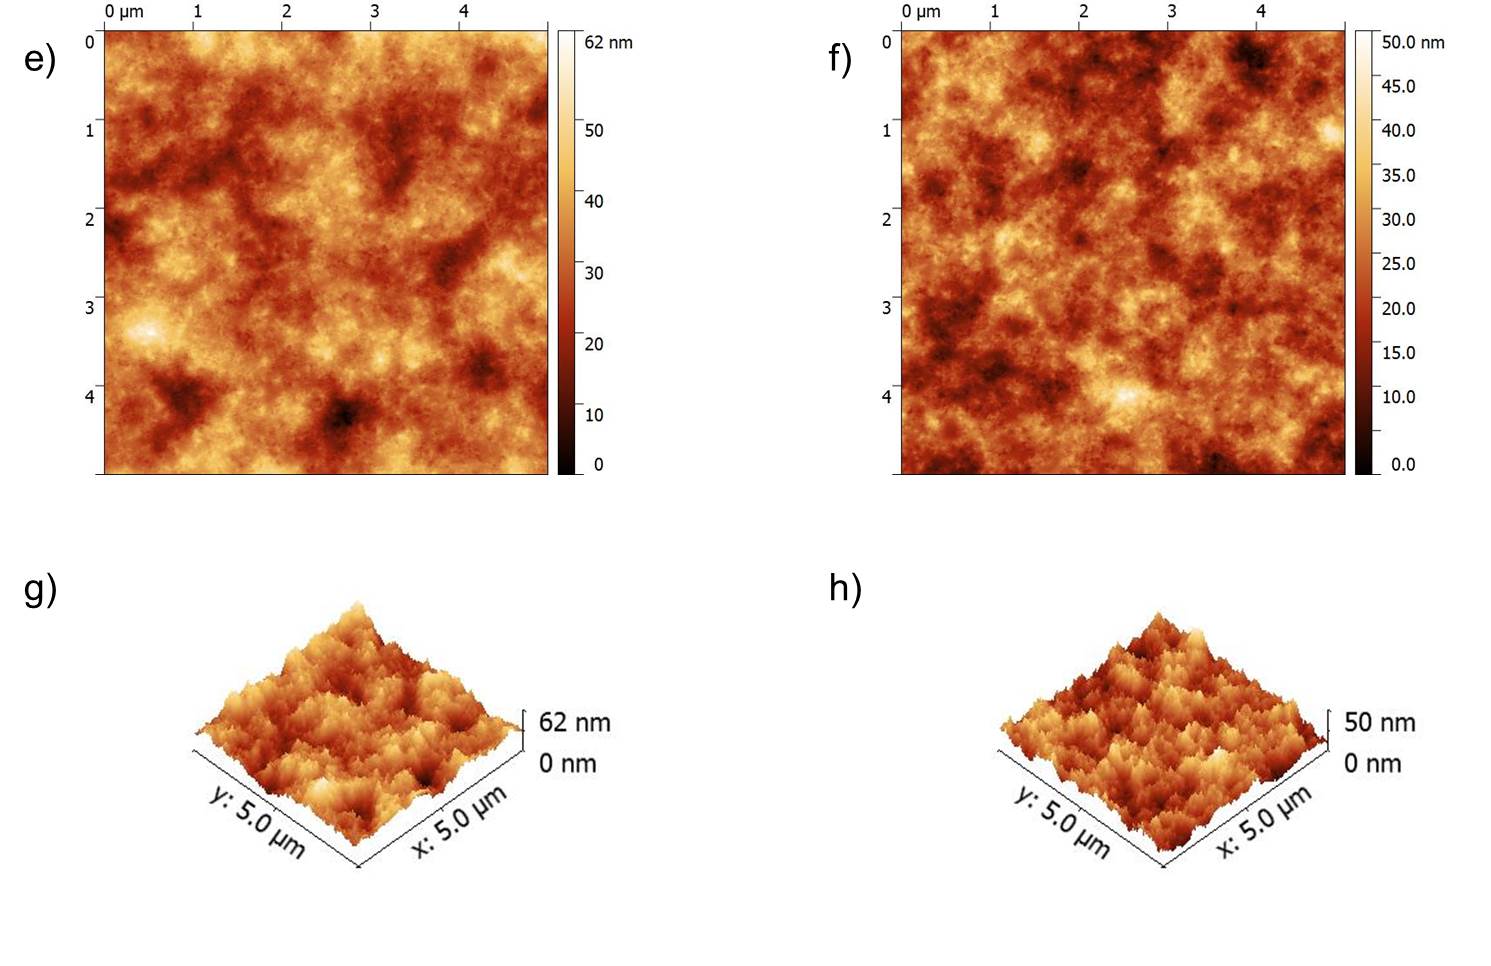

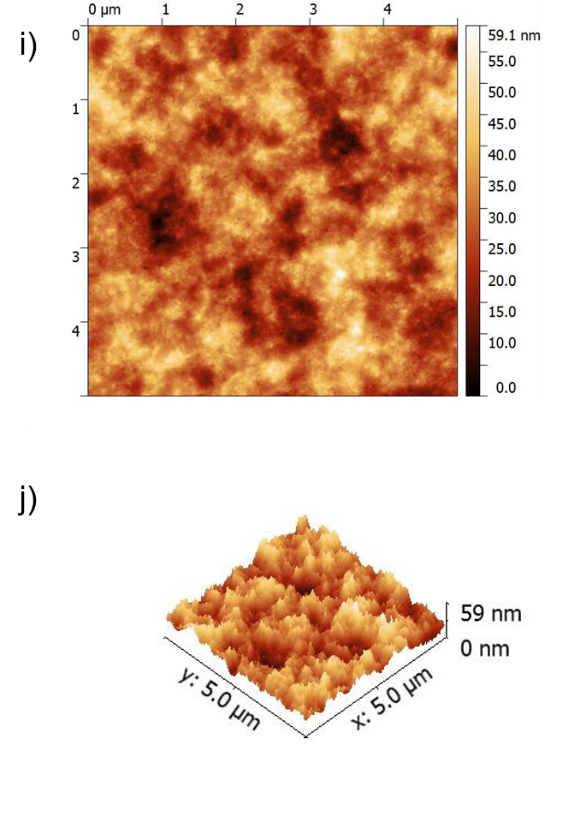


Figure S2. AFM topographical images (5µm × 5µm) of PffBT4T-2OD:PC71BM film on top of ZnO interlayer with different concentrations, a), b), e), f), i) top view image c), d), g), h), j) 3-dimensional image for concentration of 9 mg/ml, 22 mg/ml, 29.5 mg/ml, 33 mg/ml and 44 mg/ml respectively.


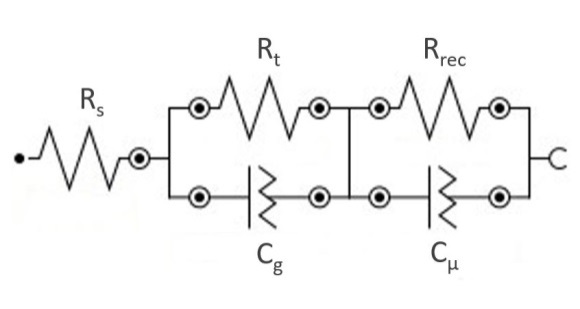


Fig S3. An equivalent circuit has been fitted to impedance measurements containing 5 components; Rs represents series resistance; R1 and R2 represent charge transport resistance and recombination resistance, respectively; Cg and Cμ represents bulk capacitance and chemical capacitance, respectively1.


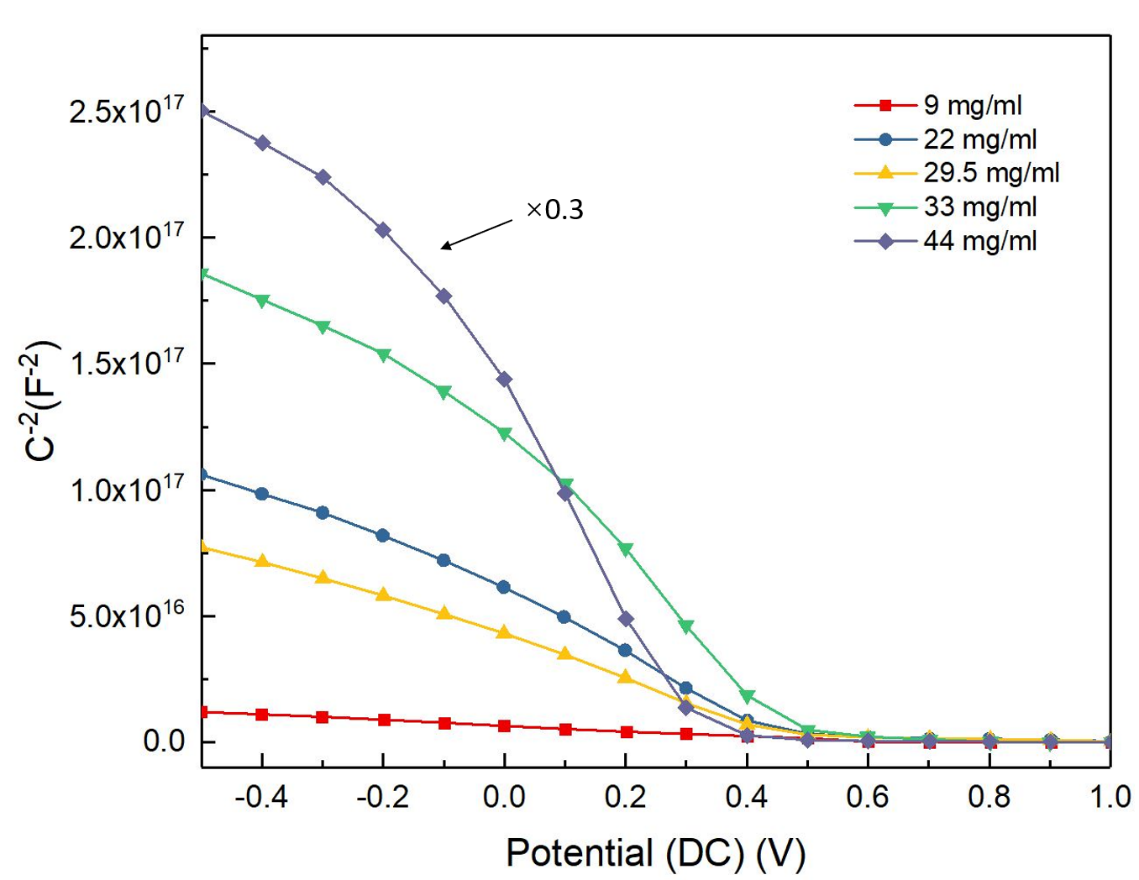


Fig S4. Mott Schottky of PffBT4T-2OD:PC71BM devices cast with different concentrations at 10 kHz frequency under dark.

Table S1. FWHM and Crystallite size for PffBT4T-2OD:PC71BM film processed with different concentrations estimated from fitted XRD pattern.

| Concentration (mg/ml) | FWHM | Crystallite size |
| --- | --- | --- |
| 9 | N/A | N/A |
| 22 | 3.36 nm | 2.53 |
| 29.5 | 2.62 nm | 3.23 |
| 33 | 2.60 nm | 3.26 |
| 44 | 2.49 nm | 3.41 |

1. Garcia-Belmonte, G.; Munar, A.; Barea, E. M.; Bisquert, J.; Ugarte, I.; Pacios, R., Charge carrier mobility and lifetime of organic bulk heterojunctions analyzed by impedance spectroscopy. *Organic Electronics* **2008,** *9* (5), 847-851.
